# Supplementary material for: An oral drug delivery system with programmed drug release and imaging properties for orthotopic colon cancer therapy
Source: Royal Society of Chemistry journal article supplement (doi:10.1039/c9nr03802g), 2019-01-01
Supplement: c9nr03802g1.pdf [file c9nr03802g1.pdf]

## An oral drug delivery system with programmed drug release and imaging properties for orthotopic colon cancer therapy

Qingling Song<sup>1,2,3</sup>, Jiajia Jia<sup>1,2,3</sup>, Xiuxiu Niu<sup>1,2,3</sup>, Cuixia Zheng<sup>1,2,3</sup>, Hongjuan Zhao<sup>1,2,3</sup>,  
Lingling Sun<sup>1,2,3</sup>, Hongling Zhang<sup>1,2,3</sup>, Lei Wang<sup>1,2,3,\*</sup>, Zhenzhong Zhang<sup>1,2,3,\*</sup>, Yun  
Zhang<sup>1,2,3,\*</sup>

<sup>1</sup> School of Pharmaceutical Sciences, Zhengzhou University, 100 Kexue Avenue, Zhengzhou 450001, China

<sup>2</sup> Key Laboratory of Targeting Therapy and Diagnosis for Critical Diseases, Zhengzhou 450001, PR China

<sup>3</sup> Collaborative Innovation Centre of New Drug Research and Safety Evaluation, Henan Province, 100 Kexue Avenue, Zhengzhou 450001, PR China

\* Corresponding authors: School of Pharmaceutical Sciences, Zhengzhou University, 100 Kexue Avenue, Zhengzhou, Henan Province 450001, PR China.

E-mail addresses: hahalei@139.com (L. Wang), zhangzz08@126.com (Z. Zhang), zhang\_yun@ymail.com (Y. Zhang).

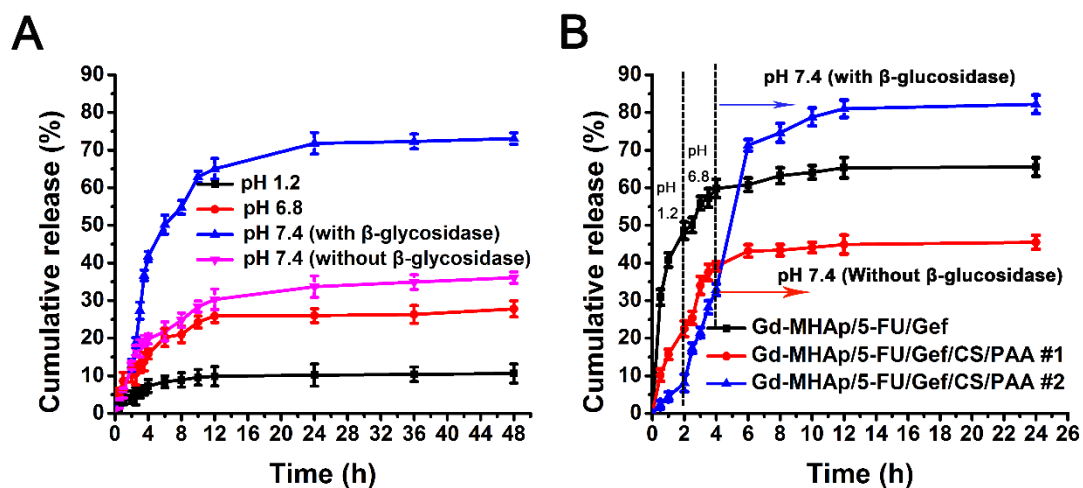

Fig. S1 5-FU release profiles in vitro. (A) Drug release behavior from preparation at different pH. (B) Release behavior of drug from Gd-MHAp/5-FU/Gefitinib and Gd-MHAp/5-FU/Gefitinib/CS/PAA incubated in a buffer with gradually changed pH over 24 h.

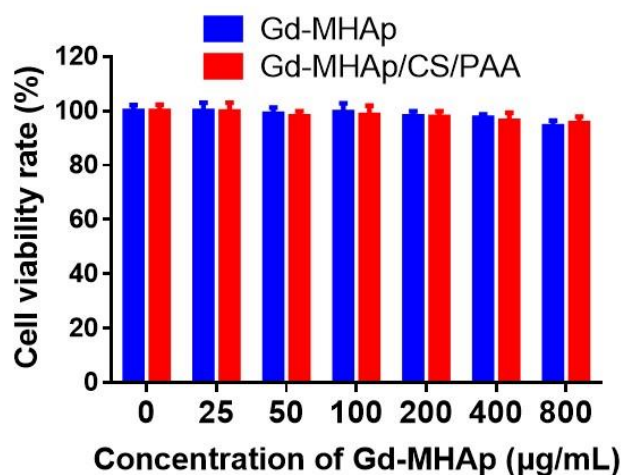

Fig. S2 Cytotoxicity. Cell viability of Gd-MHAp and Gd-MHAp/CS/PAA after 24 h treatment.

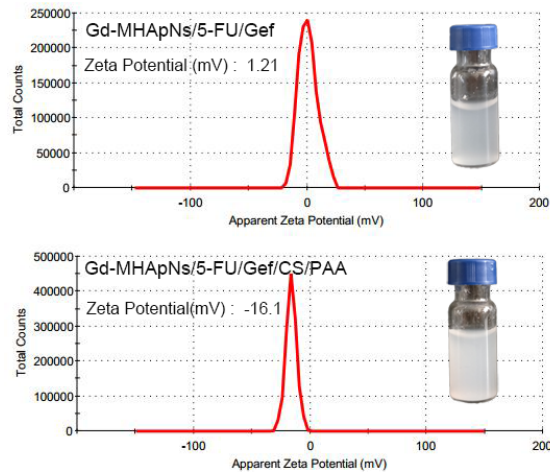

Fig. S3 Zeta potential of Gd-MHAp/5-FU/Gef and Gd-MHAp/5-FU/Gef /CS/PAA NPs.

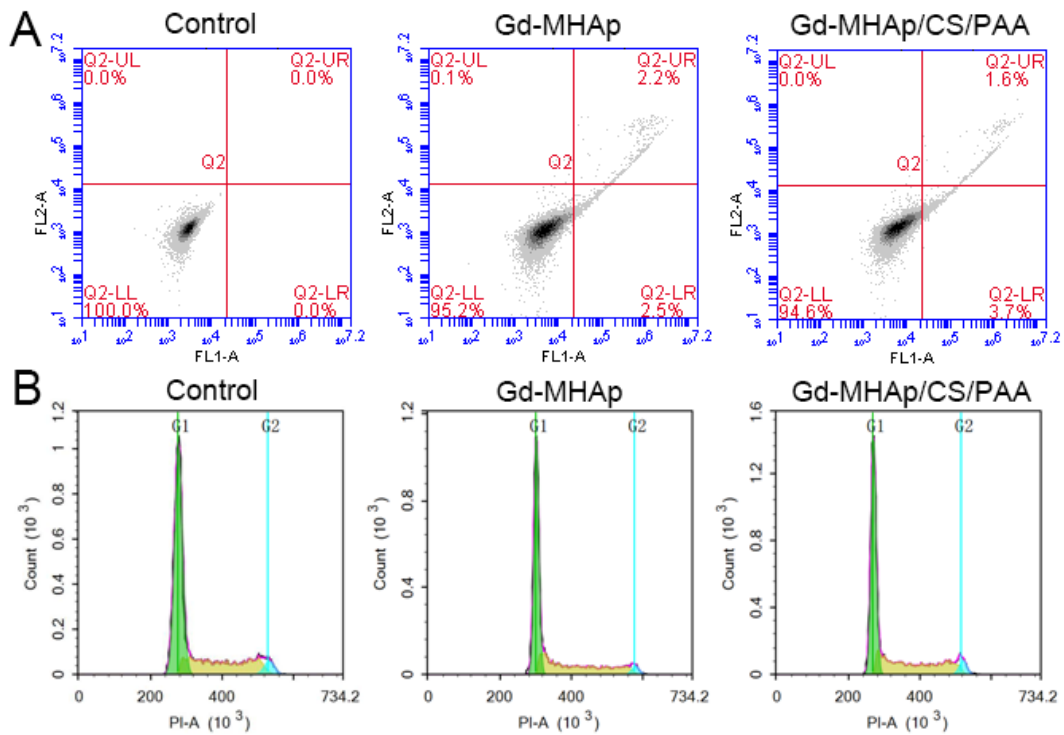

Fig. S4 Apoptosis and cell cycle assay of HT-29 cells after incubated with different formulations for 24 h.

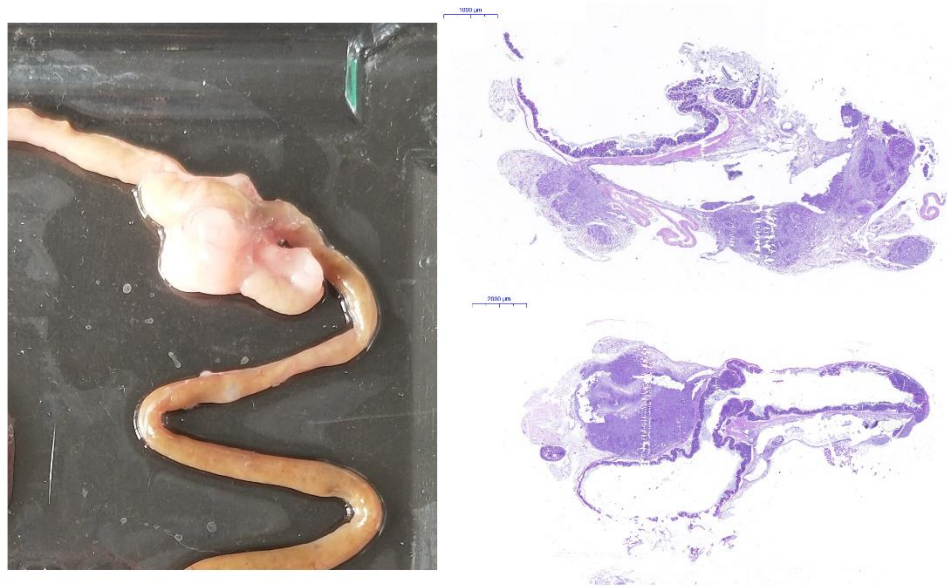

Fig. S5 Histologic section of colonic tumor.

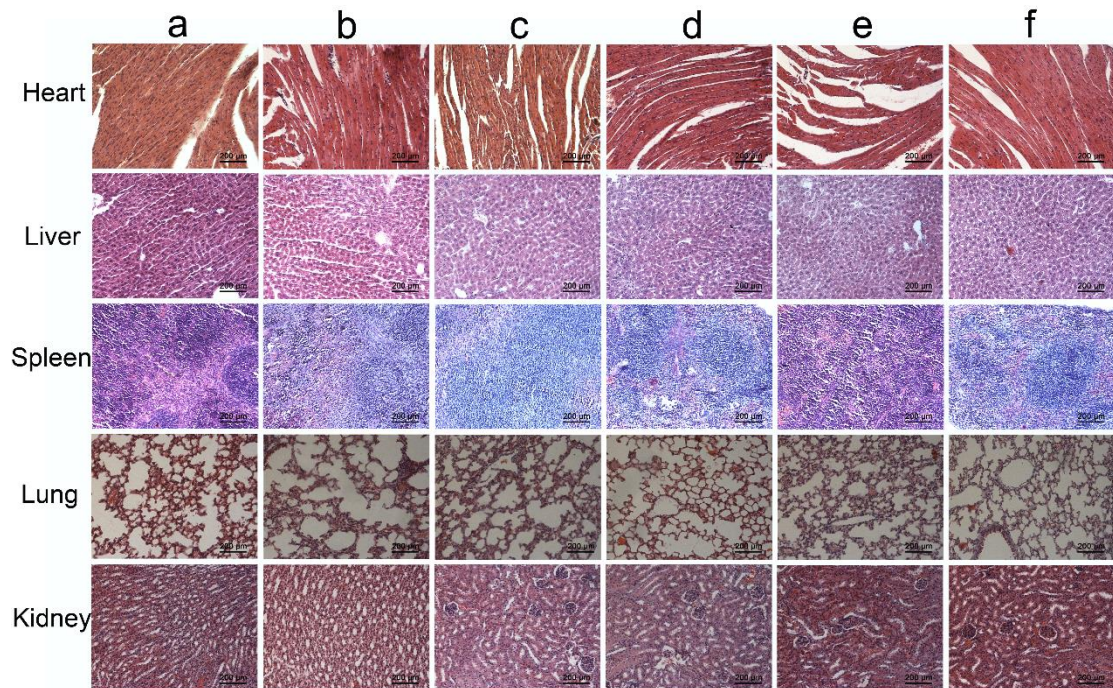

Fig. S6 Histologic assessments of major organs with H&E staining: (a) saline, (b) free 5-FU + Gefitinib, (c) Gd-MHAp/5-FU/CS/PAA, (d) Gd-MHAp/Gefitinib/CS/PAA, (e) Gd-MHAp/5-FU/Gefitinib, (f) Gd-MHAp/5-FU/Gefitinib/CS/PAA.

|   | Freq G <sub>1</sub> | Freq S | Freq G2 | G2/G1 | CV G1 |
|---|---------------------|--------|---------|-------|-------|
| A | 65.59               | 27.54  | 4.68    | 1.91  | 2.88% |
| B | 21.99               | 71.12  | 6.05    | 1.91  | 2.86% |
| C | 73.36               | 19.41  | 4.19    | 1.91  | 2.50% |
| D | 43.18               | 46.89  | 8.87    | 1.90  | 2.99% |
| E | 28.37               | 68.72  | 2.57    | 1.96  | 3.04% |
| F | 63.58               | 29.33  | 3.56    | 1.92  | 2.96% |
| G | 42.65               | 47.95  | 8.26    | 1.90  | 2.63% |

Table S1 Average percentage of cell-cycle distribution in each phase. (A) Control, (B).5-FU; (C) Gef; (D) 5-FU + Gef; (E) Gd-MHAp/5-FU; (F) Gd-MHAp/Gef; f. (G) Gd-MHAp/5-FU/Gef. (Mean  $\pm$ SD,  $n = 3$ )
